# Supplementary material
Source: Royal Society of Chemistry journal article supplement (doi:10.1039/d6sm00434b)

## Underwater mussel-inspired adhesive formed by simple coacervation

### Supporting Information

Figure S1. Determination of the linear viscoelastic region

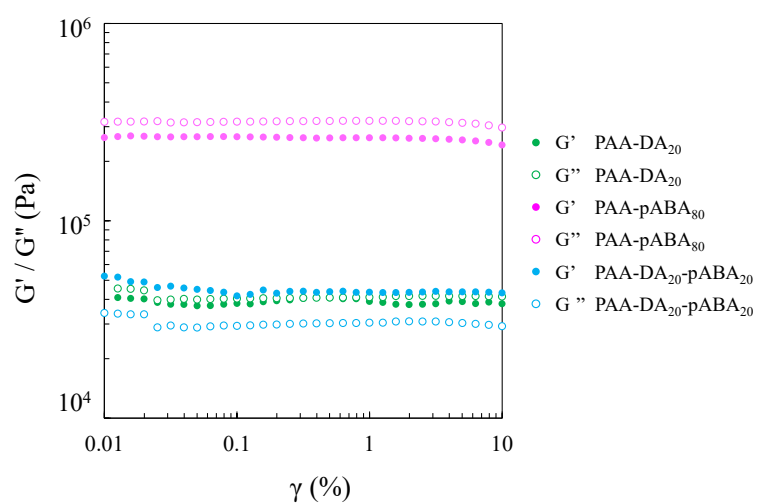

Figure S2 : Scheme of the underwater experiments

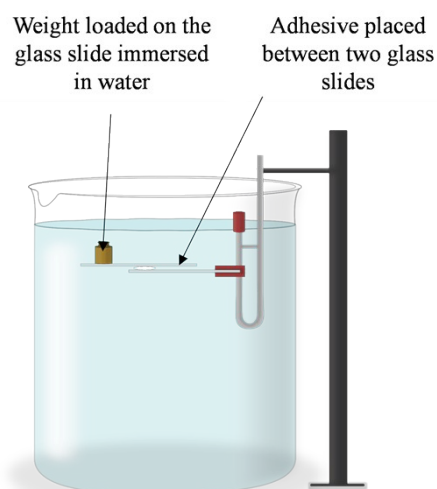

Supplement: d6sm00434b1.pdf [file d6sm00434b1.pdf]
